# Supplementary material for: Integrated Identification and Genetic Diversity of Potentially Invasive Clearwing Moths (Lepidoptera: Cossoidea: Sesiidae) in Korea
Source: MDPI journal article supplement (doi:10.3390/insects15010079), 2024-01-22
Supplement: s1 [file s1]

**Table S1. Information for all sequences used in molecular analyses.**

| No. | Sample ID | Scientific name            | Genbank accession No. /<br>BIN ID | Country     |
|-----|-----------|----------------------------|-----------------------------------|-------------|
| 1   | 22SN1     | <i>Sphecodoptera sheni</i> | PP003748 (this study)             | South Korea |
| 2   | 22SN2     | <i>Sphecodoptera sheni</i> | PP003749 (this study)             | South Korea |
| 3   | 23BC3     | <i>Sphecodoptera sheni</i> | PP003750 (this study)             | South Korea |
| 4   | 23BC4     | <i>Sphecodoptera sheni</i> | PP003751 (this study)             | South Korea |
| 5   | 23BC5     | <i>Sphecodoptera sheni</i> | PP003752 (this study)             | South Korea |
| 6   | 23BC6     | <i>Sphecodoptera sheni</i> | PP003753 (this study)             | South Korea |
| 7   | 23BC7     | <i>Sphecodoptera sheni</i> | PP003754 (this study)             | South Korea |
| 8   | 23BC8     | <i>Sphecodoptera sheni</i> | PP003755 (this study)             | South Korea |
| 9   | 23CHC9    | <i>Sphecodoptera sheni</i> | PP003756 (this study)             | South Korea |
| 10  | 23CHC10   | <i>Sphecodoptera sheni</i> | PP003757 (this study)             | South Korea |
| 11  | 23CHC11   | <i>Sphecodoptera sheni</i> | PP003758 (this study)             | South Korea |
| 12  | 23CHC12   | <i>Sphecodoptera sheni</i> | PP003759 (this study)             | South Korea |
| 13  | 23CHC13   | <i>Sphecodoptera sheni</i> | PP003760 (this study)             | South Korea |
| 14  | 23SN14    | <i>Sphecodoptera sheni</i> | PP003761 (this study)             | South Korea |
| 15  | 23SN15    | <i>Sphecodoptera sheni</i> | PP003762 (this study)             | South Korea |
| 16  | 23SN16    | <i>Sphecodoptera sheni</i> | PP003763 (this study)             | South Korea |
| 17  | 23SN17    | <i>Sphecodoptera sheni</i> | PP003764 (this study)             | South Korea |
| 18  | 23SN18    | <i>Sphecodoptera sheni</i> | PP003765 (this study)             | South Korea |
| 19  | 23SN19    | <i>Sphecodoptera sheni</i> | PP003766 (this study)             | South Korea |
| 20  | 23SN20    | <i>Sphecodoptera sheni</i> | PP003767 (this study)             | South Korea |
| 21  | CJ1S      | <i>Sphecodoptera sheni</i> | PP003768 (this study)             | South Korea |
| 22  | CJ2S      | <i>Sphecodoptera sheni</i> | PP003769 (this study)             | South Korea |
| 23  | DG1S      | <i>Sphecodoptera sheni</i> | PP003770 (this study)             | South Korea |
| 24  | DG2S      | <i>Sphecodoptera sheni</i> | PP003771 (this study)             | South Korea |
| 25  | DG3S      | <i>Sphecodoptera sheni</i> | PP003772 (this study)             | South Korea |
| 26  | DG4S      | <i>Sphecodoptera sheni</i> | PP003773 (this study)             | South Korea |
| 27  | DG5S      | <i>Sphecodoptera sheni</i> | PP003774 (this study)             | South Korea |
| 28  | DG6S      | <i>Sphecodoptera sheni</i> | PP003775 (this study)             | South Korea |
| 29  | IPE4W4S   | <i>Sphecodoptera sheni</i> | PP003776 (this study)             | South Korea |
| 30  | IPE5W5S   | <i>Sphecodoptera sheni</i> | PP003777 (this study)             | South Korea |
| 31  | IPE6W6S   | <i>Sphecodoptera sheni</i> | PP003778 (this study)             | South Korea |
| 32  | IlSa7S    | <i>Sphecodoptera sheni</i> | PP003779 (this study)             | South Korea |
| 33  | IlSan8S   | <i>Sphecodoptera sheni</i> | PP003780 (this study)             | South Korea |
| 34  | IlSan9S   | <i>Sphecodoptera sheni</i> | PP003781 (this study)             | South Korea |
| 35  | IlSan10S  | <i>Sphecodoptera sheni</i> | PP003782 (this study)             | South Korea |
| 36  | IlSan11S  | <i>Sphecodoptera sheni</i> | PP003783 (this study)             | South Korea |
| 37  | BWLW7S    | <i>Sphecodoptera sheni</i> | PP003784 (this study)             | South Korea |
| 38  | BWLW8     | <i>Sphecodoptera sheni</i> | PP003785 (this study)             | South Korea |

|    |               |                                    |                        |                  |
|----|---------------|------------------------------------|------------------------|------------------|
| 39 | IPE3W3P       | <i>Paranthrenella</i> sp. n.       | PP003786 (this study)  | South Korea      |
| 40 | BWLW9P        | <i>Paranthrenella</i> sp. n.       | PP003787 (this study)  | South Korea      |
| 41 | BWLW10P       | <i>Paranthrenella</i> sp. n.       | PP003788 (this study)  | South Korea      |
| 42 | JH3Aj         | <i>Anatrachyntis japonica</i>      | PP003789 (this study)  | South Korea      |
| 43 | JH4Aj         | <i>Anatrachyntis japonica</i>      | PP003790 (this study)  | South Korea      |
| 44 | GSCMB812-12   | <i>Sphecodoptera sheni</i>         | BOLD:ABW9347           | China            |
| 45 | ANICF612-10   | <i>Paranthrenella chrysophanes</i> | HQ922206/ BOLD:AAI7641 | Australia        |
| 46 | ANICF613-10   | <i>Paranthrenella chrysophanes</i> | HQ922207/ BOLD:AAI7641 | Australia        |
| 47 | ANICF615-10   | <i>Paranthrenella chrysophanes</i> | HQ922208/ BOLD:AAI7641 | Australia        |
| 48 | LTOLB087-08   | <i>Paranthrenella chrysophanes</i> | KF522587/ BOLD:AAI7641 | Australia        |
| 49 | EPNG8497-14   | <i>Paranthrenella auriplena</i>    | BOLD:ACO5543           | Papua New Guinea |
| 50 | GBMNE5028-21  | <i>Paranthrenella cinnamoma</i>    | MW315912/ BOLD:AEN4976 | China            |
| 51 | GBMNE61298-22 | <i>Paranthrenella formosicola</i>  | OM401537/ BOLD:AEY6232 | Taiwan           |
| 52 | EPNG8498-14   | <i>Paranthrenella terminalia</i>   | BOLD:ACO5542           | Papua New Guinea |

---

**Table S2. Haplotype distribution in this study.**

| Haplotype_number | No. of sequences | Sample ID (for each individual)                                                                                                                                                                                       |
|------------------|------------------|-----------------------------------------------------------------------------------------------------------------------------------------------------------------------------------------------------------------------|
| Hap_1:           | 30               | 22SN1, 22SN2, 23BC3, 23BC4, 23BC5, 23BC6, 23BC8, 23CHC9, 23CHC11, 23CHC12, 23CHC13, 23SN14, 23SN15, 23SN16, 23SN17, 23SN18, 23SN19 23SN20 CJ2S DG1S DG2S DG3S DG4S DG5S DG6S IPE4W4S IPE5W5S Ilsan8S Ilsan9S Ilsan10S |
| Hap_2:           | 2                | 23BC7, CJ1S                                                                                                                                                                                                           |
| Hap_3:           | 1                | 23CHC10                                                                                                                                                                                                               |
| Hap_4:           | 1                | IPE6W6S                                                                                                                                                                                                               |
| Hap_5:           | 1                | Ilsa7S                                                                                                                                                                                                                |
| Hap_6:           | 1                | Ilsan11S                                                                                                                                                                                                              |
| Hap_7:           | 2                | BWLW7S, BWLW8S                                                                                                                                                                                                        |
| Hap_8:           | 1                | GSCMB812-12                                                                                                                                                                                                           |
| Hap_9:           | 1                | IPE3W3P                                                                                                                                                                                                               |
| Hap_10:          | 2                | BWLW9P, BWLW10P                                                                                                                                                                                                       |
| Hap_11:          | 2                | ANICF612-10, ANICF615-10                                                                                                                                                                                              |
| Hap_12:          | 1                | ANICF613-10                                                                                                                                                                                                           |
| Hap_13:          | 1                | LTOLB087-08                                                                                                                                                                                                           |
| Hap_14:          | 1                | EPNG8497-14                                                                                                                                                                                                           |
| Hap_15:          | 1                | GBMNE5028-21                                                                                                                                                                                                          |
| Hap_16:          | 1                | EPNG8498-14                                                                                                                                                                                                           |
| Hap_17:          | 1                | GBMNE61298-22                                                                                                                                                                                                         |
| Hap_18:          | 2                | JH3Aj, JH4Aj                                                                                                                                                                                                          |
